# Supplementary material for: Oxidative dissolution of lithium and manganese from lithium manganospinel (LiMn2O4): towards climate-smart processes for critical metal recycling
Source: Royal Society of Chemistry journal article supplement (doi:10.1039/d2ya00196a), 2023-01-01
Supplement: d2ya00196a1.pdf [file d2ya00196a1.pdf]

**Oxidative Dissolution of Lithium and Manganese from Lithium Manganospinel  
(LiMn<sub>2</sub>O<sub>4</sub>): Towards Climate-Smart Processes for Critical Metal Recycling**

Rhys A. Ward,<sup>\*1,2</sup> Dávid Kocsis,<sup>\*1,2,3</sup> Jay D. Wadhawan<sup>\*1,2</sup>

<sup>1</sup>*Department of Chemical Engineering, The University of Hull,  
Cottingham Road, Kingston-upon-Hull HU6 7RX, United Kingdom.*

<sup>2</sup>*Aura Innovation Centre, Bridgehead Business Park,  
Meadow Road, Hessle HU13 0GD, United Kingdom.*

<sup>3</sup>*Singleton Birch, Ltd., Melton Ross Quarries,  
Barnetby DN38 6AE, North Lincolnshire, United Kingdom.*

**Electronic Supporting Information**

|                                                                                                |           |
|------------------------------------------------------------------------------------------------|-----------|
| <b>ESI1: Experimental</b>                                                                      | <b>S2</b> |
| <b>ESI2: Oxidative Dissolution Chemistry</b>                                                   | <b>S2</b> |
| <b>ESI3: Interplay between Mass Transport and Surface Kinetics in<br/>Reactive Dissolution</b> | <b>S3</b> |
| <b>ESI4: Estimation of the Mass Transport Coefficient and its<br/>Temperature-Dependence</b>   | <b>S5</b> |
| <b>ESI5: References</b>                                                                        | <b>S6</b> |

## ESI1: Experimental

Chemical reagents used:  $\text{LiMn}_2\text{O}_4$  (~325 mesh powder, 99.5% metal basis, Alfa Aesar) and alkaline  $\text{NaClO}$  (8%  $\text{Cl}$ , Fisher Scientific) were used as supplied. Experiments were undertaken using a specified mass of  $\text{LiMn}_2\text{O}_4$  and 80 mL (100 g) of  $\text{NaClO}$  solution in a round-bottomed flask equipped with a Liebig condenser, thermostatted at a specified temperature, for 1 h, in a fume cupboard. Aliquots of the resulting pink solution were withdrawn from the flask, and after the settling of any solids in the samples, the pink solution was placed in a high precision synthetic quartz cuvette (Hëlima Analytics, 1 cm path-length) and analysed using a Jenway 7315 spectrophotometer at ambient temperature ( $20 \pm 2$  °C).

## ESI2: Oxidative Dissolution Chemistry

We consider the oxidative dissolution reaction of lithium manganospinel in alkaline hypochlorite as comprising the following steps, based on the  $\text{Mn}^{\text{III}}$  to  $\text{Mn}^{\text{VII}}$  oxidative sequence previously proposed by us.<sup>S1</sup>

*Heterogeneous oxidation of  $\text{Mn}^{\text{III}}$  to  $\text{Mn}^{\text{IV}}$ :*

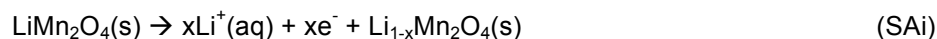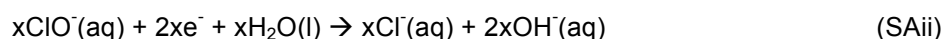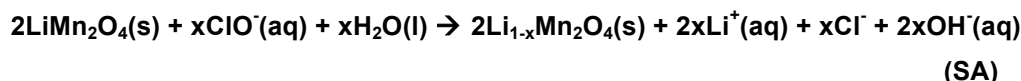

*Heterogeneous oxidation of  $\text{Mn}^{\text{IV}}$  and residual  $\text{Mn}^{\text{III}}$  to  $\text{Mn}^{\text{VI}}$ :*

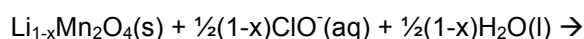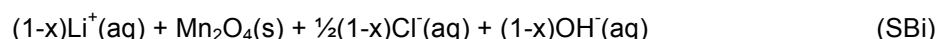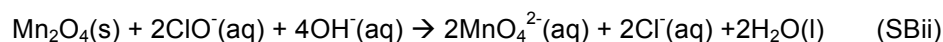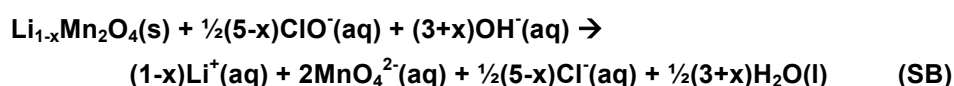

*Homogeneous oxidation of  $\text{Mn}^{\text{VI}}$  to  $\text{Mn}^{\text{VII}}$ :*

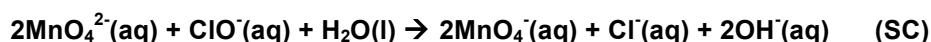

In reaction (SA), the lithium manganospinel, which comprises a stoichiometrically equivalent amount of  $\text{Mn}^{\text{III}}$  and  $\text{Mn}^{\text{IV}}$  species, is partially oxidised by hypochlorite, releasing lithium ions, to afford the solid  $\text{Li}_{1-x}\text{Mn}_2\text{O}_4$ , which contains  $(1+x)\text{Mn}^{\text{VI}}$  and  $(1-x)\text{Mn}^{\text{III}}$  species. The relevant half-reaction (SAi) has been studied electrochemically,<sup>S2-S7</sup> where two voltammetric oxidation peaks are observed at<sup>S4,S5</sup> 0.89 and 1.01 V vs.  $\text{Ag}/\text{AgCl}/\text{Cl}^-$  (1 M  $\text{LiCl}$ ), which correspond to partial lithium ion extraction from the tetrahedral sites in the presence and absence of lithium-lithium interactions, respectively,<sup>S4,S5</sup> with reverse peaks at 0.69 and 0.89 V vs.  $\text{Ag}/\text{AgCl}/\text{Cl}^-$  (1 M  $\text{LiCl}$ ) corresponding to the two different lithium ion re-insertion events. The cyclic

voltammograms at single particles<sup>S5</sup> corresponding to reaction (SAi) reveal chemically reversible but electrochemically quasi-reversible characteristics:<sup>S4,S5</sup> the *onset* potential for the oxidation varies with particle shape and size,<sup>S7</sup> and is ca. 0.7 V vs. Ag/AgCl/Cl<sup>-</sup> (1 M LiCl), with the mid-point potentials ( $E_{\text{mid}} = \frac{1}{2}(E_p^{\text{Ox}} + E_p^{\text{Red}})$ ) being 0.79 and 0.95 V vs. Ag/AgCl/Cl<sup>-</sup> (1 M LiCl). These indicate that reaction (SA) will only be fast provided there is sufficient driving force for the reaction.

The experiments by Unwin *et al.*<sup>S5</sup> were undertaken at ambient temperature, using a Ag/AgCl/Cl<sup>-</sup> (1 M LiCl) reference electrode. At 25 °C, the mean ionic activity coefficient is<sup>S8</sup> 0.774, which, assuming it does not vary by very much when considering ambient temperatures, and that no silver chloride complex ion is involved in the potential-determining reactions, affords a reference potential of 0.216 V vs. SHE, so that the minimum oxidant strength is ca. 1.0 V vs. SHE. This is close to the oxidising strength of alkaline hypochlorite (ca. 0.8 – 0.9 V vs. SHE),<sup>S8,S9</sup> so that *it is likely that reaction (SA) is slow*. The use of sodium hydroxide as the alkaline stabiliser to hypochlorite will give an additional energy barrier, since reaction (SAi) requires higher potentials in sodium hydroxide electrolytes.<sup>S6</sup>

Considering the further oxidation reactions, we start with reaction (SB). This has been split into two steps: in the first, reaction (SBi), any residual Mn<sup>III</sup> is oxidatively de-lithiated to afford a spinel-related manganese dioxide.<sup>S2,S3</sup> Since MnO<sub>2</sub> oxidation to the manganate ion has an oxidation potential of ca. 0.6 V vs. SHE,<sup>S9</sup> reaction (SBii) is expected to be rapid.<sup>S10</sup> Thus, overall, reaction (SB) is expected to be rapid.

Reaction (SC), which is insensitive to pH, is, likewise, anticipated to be rapid: under standard conditions, the half-equation  $\text{MnO}_4^{2-} - 2e^- \rightarrow \text{MnO}_4^-$  has an oxidation potential of -0.56 V vs. SHE.<sup>S9</sup>

Thus, for the overall reaction,

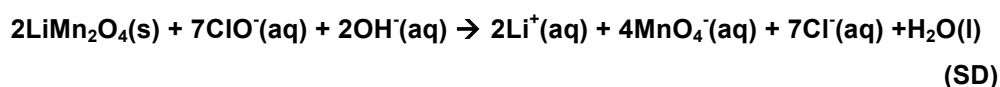

it is likely that the rate-limiting step in the oxidative dissolution of both lithium and manganese from LiMn<sub>2</sub>O<sub>4</sub> under alkaline conditions is the initial reaction, equation (SA).

### ESI3: Interplay between Mass Transport and Surface Kinetics in Reactive Dissolution

Reaction (SD) is a heterogeneous reaction between aqueous hypochlorite and the LiMn<sub>2</sub>O<sub>4</sub> particle surface. It will require hypochlorite ions and water molecules to be transported from bulk solution to the solid/liquid interface, where the reaction occurs, with lithium, chloride and hydroxide ions as the reaction products being transported back to the bulk solution, together with any unreacted hypochlorite (the reaction is stirred).

Accordingly, since the concentration of  $\text{LiMn}_2\text{O}_4$  at the particle surface (concentration = density/molar mass =  $4.29 \text{ g cm}^{-3}/181 \text{ g mol}^{-1} = 23.7 \text{ M}$ ) is ca. ten times greater than the concentration of hypochlorite in bulk solution (2.8 M), the reaction can be considered as pseudo-first order in  $\text{ClO}^-$ , so that reaction (SA) can be modelled as:

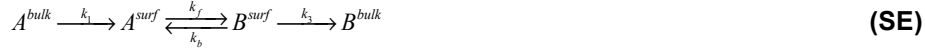

where A and B represent the solution-based reactant ( $\text{ClO}^-$ ) and product ( $\text{Cl}^-$ ,  $\text{Li}^+$ , etc.), respectively, and bulk and surf superscripts indicate their location in the main solution, or at the interface, respectively. The mass transfer coefficients are  $k_1$  and  $k_3$ , with  $k_f$  and  $k_b$  being the rate constants for the forward and reverse heterogeneous electron transfer reactions, respectively, with the equilibrium constant,  $K_2$  being their ratio:  $K_2 = k_f/k_b$ . Note that in reaction (SE) we consider the transport properties of all of the reactants to be the same, and those for all of the products to be identical (but different to the reactants).

Since mass transfer flux must match the reaction kinetics, the rate of the surface reaction (in moles per unit area per unit time) is given by:<sup>S11</sup>

$$\text{Rate of surface reaction} = k_f c_A^{surf} - k_b c_B^{surf} = k_1 (c_A^{bulk} - c_A^{surf}) = k_3 (c_B^{surf} - c_B^{bulk}) \quad (\text{S1})$$

in which  $c_i^j$  is the concentration of species i in location j. Algebraic manipulation of the terms in equation (S1) to eliminate surface concentrations affords the expression:

$$\text{Rate of surface reaction} = K \left( c_A^{bulk} - \frac{c_B^{bulk}}{K_2} \right) \quad (\text{S2})$$

where,

$$\frac{1}{K} = \frac{1}{k_1} + \frac{1}{k_f} + \frac{1}{K_2 k_3} \quad (\text{S3})$$

The variable K in equation (S2) has three important general limits:

- (i) if the particle suspension is stirred rapidly,  $k_1$  and  $k_3$  may tend to infinity, so that  $K \rightarrow k_f$  and the rate of reaction is controlled by the rate of the forward surface

$$\text{kinetics: } \text{Rate of surface reaction} = k_f \left( c_A^{bulk} - \frac{c_B^{bulk}}{K_2} \right);$$

- (ii) for an irreversible chemical reaction,  $K_2 \rightarrow \infty$ , and thus, the rate of reaction is controlled by the hybrid of both reactant mass transfer and reactant surface

$$\text{kinetics: } K \rightarrow \frac{k_1 k_f}{k_1 + k_f} \text{ and } \text{Rate of surface reaction} = \frac{k_1 k_f}{k_1 + k_f} c_A^{bulk}; \text{ and}$$

- (iii) if the reaction is undertaken at high temperature, since mass transfer activation is less sensitive than chemical reaction activation,<sup>S12</sup>  $k_f$  and  $k_b$  are both much

greater than  $k_1$  and  $k_3$ , and, therefore  $\frac{1}{K} \rightarrow \frac{1}{k_1} + \frac{1}{K_2 k_3}$  leading to

$$\text{Rate of surface reaction} = \frac{k_1 k_3 K_2}{k_1 + K_2 k_3} \left( c_A^{\text{bulk}} - \frac{c_B^{\text{bulk}}}{K_2} \right).$$

#### ESI4: Estimation of the Mass Transport Coefficient and its Temperature-Dependence

The interplay between transport and kinetics for the assumed rate-limiting step, reaction (SA), complicate the temperature-dependence of the observed permanganate formation: for example, in a diffusion-controlled process, the rate may not scale directly with diffusion coefficient.

Given that the stirred particle suspension has an additional transport contribution induced through heating the suspension, we can estimate the value of the mass transfer coefficient ( $k_{\text{mt}}$ ) using the correlation suggested by Harriott,<sup>S13</sup> employing the protocol detailed by Sherwood, Pigford and Wilke<sup>S14</sup> to ascertain the minimum value for  $k_{\text{mt}}$  as the terminal velocity of a spherical particle falling under gravity, at each temperature.

Thus, we may first estimate the terminal velocity ( $u_{\text{ts}}$ ) of a spherical  $\text{LiMn}_2\text{O}_4$  particle from Stokes's law:

$$u_{\text{ts}} = \frac{d_p^2 |\rho_{\text{LiMn}_2\text{O}_4} - \rho_{\text{H}_2\text{O}}| g}{18\eta} \quad (\text{S4})$$

In equation (S4),  $d_p$  is the diameter of the spherical particle (44  $\mu\text{m}$ ),  $\rho_i$  is the density of species  $i$ ,  $\eta$  is the viscosity of the aqueous phase, and  $g$  is the gravitational acceleration. The continuous aqueous phase was assumed to have the physical properties of pure water, as data pertaining to their temperature-dependence are readily available (see Table S1).<sup>S8</sup> For the specific temperatures used, it was necessary to employ linear interpolation from those data.

**Table S1:** Temperature-dependence of the viscosity and density of pure water, taken from reference S8

| Temperature<br>/ $^{\circ}\text{C}$ | Density<br>/ $\text{g mL}^{-1}$ | Viscosity<br>/ $\mu\text{Pa s}$ |
|-------------------------------------|---------------------------------|---------------------------------|
| 100                                 | 0.95840                         | 281.8                           |
| 90                                  | 0.96535                         | 314.5                           |
| 80                                  | 0.97182                         | 354.4                           |
| 70                                  | 0.97778                         | 404.0                           |
| 60                                  | 0.98320                         | 466.5                           |
| 50                                  | 0.98803                         | 547.0                           |
| 20                                  | 0.99821                         | 1002                            |

Second, we may infer the Reynolds number at this terminal velocity ( $\text{Re}_{\text{ts}}$ ) for each specified temperature, using equation (S5):

$$\text{Re}_{\text{ts}} = \frac{d_p u_{\text{ts}} \rho_{\text{H}_2\text{O}}}{\eta} \quad (\text{S5})$$

Third, we estimate the terminal velocity in free fall ( $u_t$ ) through interpolation of the data provided by Sherwood, Pigford and Wilke,<sup>S14</sup> which we found fit the curve given in equation (S6) in the range  $0 \leq \lg(\text{Re}_{ts}) \leq 5$ , with a correlation coefficient  $R^2 = 0.9965$ . Note that this analysis assumed the curve was valid for  $\text{Re}_{ts} < 1$ .

$$\lg\left(\frac{u_t}{u_{ts}}\right) = 0.031\{\lg(\text{Re}_{ts})\}^2 - 0.3356\lg(\text{Re}_{ts}) + 0.9189 \quad (\text{S6})$$

Fourth, using the free-fall terminal velocity rather than the Stokes' law terminal velocity, the Reynolds number (Re) can be determined using equation (S5). This enables the mass transfer coefficient,  $k_{mt}$ , to be determined at each temperature through the correlation for forced convection around a sphere:

$$\text{Sh} = 2.0 + 0.6 \text{Re}^{1/2} \text{Sc}^{1/3} \quad (\text{S7})$$

in which Sh is the Sherwood number ( $\text{Sh} = \frac{k_{mt} d_p}{D}$ ), Sc is the Schmidt number (kinematic viscosity normalised by the diffusion coefficient of hypochlorite, D). Diffusion coefficients at different temperatures were estimated through an Arrhenius relationship, using  $D_0 = 2.032 \times 10^{-5} \text{ cm}^2 \text{ s}^{-1}$  as that for chloride in water<sup>S8</sup> at 25 °C, employing an activation energy of  $15 \text{ kJ mol}^{-1}$ , based on that determined for aqueous electrolytes using radio-frequency heating.<sup>S12</sup> This generates temperature-dependent mass transfer coefficients on the order of  $10^{-4} \text{ m s}^{-1}$  (see Table S2), which exhibit an Arrhenius activation energy of ca.  $16 \text{ kJ mol}^{-1}$ .

**Table S2:** Temperature variation of mass transfer coefficients.

| Temperature /°C | $k_{mt} / \mu\text{m s}^{-1}$ |
|-----------------|-------------------------------|
| 95              | 671.5                         |
| 83              | 564.4                         |
| 73              | 483.0                         |
| 72              | 475.4                         |
| 54              | 348.6                         |

## ESI5: References

- S1. D. Kocsis, R. A. Ward, C. R. Meyer, M. Thompson, T. J. Prior, S. M. Kelly, N. S. Lawrence, J. D. Wadhawan, Empowering clean water whilst safeguarding water distribution pipeline integrity: towards manganese- and iron-free lime hydrate for water treatment, *Environ. Sci.: Water Res. Technol.*, 2023, **9**, 833.
- S2. M. M. Thackeray, W. I. F. David, P. G. Bruce, J. B. Goodenough, Lithium insertion into manganese spinels, *Mat. Res. Bull.*, 1983, **18**, 461.
- S3. T. Ohzuku, MN. Kitagawa, T. Hirai, Electrochemistry of manganese dioxide in lithium non-aqueous cell III: X-ray diffractational study on the reduction of spinel-related manganese dioxide, *J. Electrochem. Soc.*, 1990, **137**, 769.
- S4. E. Hosono, T. Kudo, I. Honma, H. Matsuda, H. Zhou, Synthesis of single crystalline spinel  $\text{LiMn}_2\text{O}_4$  nanowires for a lithium-ion battery with high power density, *Nano Letts.*, 2009, **9**, 1045.
- S5. B. Tao, L. C. Yule, E. Daviddi, C. L. Bentley, P. R. Unwin, Correlative electrochemical microscopy of Li-ion (de)intercalation at a series of individual  $\text{LiMn}_2\text{O}_4$  particles, *Angew. Chem. Int. Ed.*, 2019, **58**, 4606.
- S6. M. Baumung, L. Kollenbach, L. Xi, M. Risch, Undesired bulk oxidation of  $\text{LiMn}_2\text{O}_4$  increases overpotential of electrocatalytic water oxidation in lithium hydroxide electrolytes, *ChemPhysChem*, 2019, **20**, 2981.
- S7. D. Guo, Z. Chang, H. Tang, B. Li, X. Xu, X-Z. Yuan, H. Wang, Electrochemical performance of solid sphere spinel  $\text{LiMn}_2\text{O}_4$  with high tap density synthesised by porous spherical  $\text{Mn}_3\text{O}_4$ , *Electrochim. Acta*, 2014, **123**, 254.
- S8. D. R. Lide (ed.), *CRC Handbook for Chemistry and Physics*, 76<sup>th</sup> edn., CRC Press, Boca Raton, FL., 1995.
- S9. W. M. Latimer, *The Oxidation States of the Elements and their Potentials in Aqueous Solution*, 2<sup>nd</sup> edn., Prentice-Hall, New York, 1952.

- S10. B. Gilbert, G. A. Waychunas, The timescale of mineral redox reactions, in I. A. M. Ahmed, K. A. Hudson-Edwards (eds.), *Redox-Reactive Minerals: Properties, Reactions and Applications in Natural Systems and Clean Technologies*, EMU Notes in Mineralogy, volume 17, chapter 4, The Mineralogical Society of Great Britain and Ireland, London, 2017, p.55.
- S11. See, for example, K. N. Han, M. C. Fuerstenau, Hydrometallurgy and solution kinetics, in M. C. Fuerstenau, K. N. Han (eds.), *Principles of Mineral Processing*, Society for Mining, Metallurgy and Exploration, Englewood, Colorado, 2003, p.413.
- S12. M. J. Moorcroft, N. S. Lawrence, B. A. Coles, R. G. Compton, L. N. Trevani, High temperature electrochemical studies using a channel flow cell heated by radio frequency radiation, *J. Electroanal. Chem.*, 2001, **506**, 28.
- S13. P. Harriott, Mass transfer to particles suspended in agitated tanks, part I, *A. I. Ch. E. Journal*, 1962, **8**, 93.
- S14. T. K. Sherwood, R. L. Pigford, C. R. Wilke, *Mass Transfer*, McGraw-Hill, New York, 1975, p.220 *f.f.*
